# Supplementary material for: High temperature induced metabolic reprogramming and lipid remodeling in a high-altitude fish species, Triplophysa bleekeri
Source: Frontiers journal article supplement (doi:10.3389/fmars.2022.1017142), 2022-10-18
Supplement: Table_2.DOCX [file Table_2.DOCX]

Supplementary Table A.2. Date quality of the RNA sequencing

| **Sample** | **Total**  **Raw**  **Reads (M)** | | **Total Clean Reads (M)** | **Total Clean**  **Bases (Gb)** | **Q20 (%)** | **Q30 (%)** | **Clean Reads Ratio (%)** | **HISAT Map Rate (%)** | **Bowtie2 Map Rate (%)** |
| --- | --- | --- | --- | --- | --- | --- | --- | --- | --- |
| **Group 10℃** | | | | | | | |  |  |
| Gut-10-1 | 48.34 | | 47.77 | 7.13 | 97.87 | 93.5 | 98.81 | 91.91 | 48 |
| Gut-10-2 | 45.66 | | 44.48 | 6.59 | 98.1 | 94.16 | 97.4 | 91.79 | 51.28 |
| Gut-10-3 | 43.83 | | 42.88 | 6.38 | 98.01 | 93.92 | 97.83 | 91.62 | 47.9 |
| Liver-10-1 | 40.75 | | 40.01 | 5.96 | 98.12 | 94.2 | 98.18 | 95.73 | 50.1 |
| Liver-10-2 | 49.75 | | 48.76 | 7.24 | 98.11 | 94.17 | 98.02 | 96.27 | 47.77 |
| Liver-10-3 | 39.79 | | 39.01 | 5.81 | 98.31 | 94.66 | 98.04 | 96.15 | 46.34 |
| Spleen-10-1 | 43.6 | | 42.78 | 6.35 | 98.06 | 94.06 | 98.13 | 93.71 | 62.56 |
| Spleen-10-2 | 48.01 | 47.12 | | 6.97 | 98.15 | 94.26 | 98.14 | 95.41 | 63.68 |
| Spleen-10-3 | 42.66 | 41.93 | | 6.2 | 98.21 | 94.42 | 98.31 | 92.82 | 64 |
| Kidney-10-1 | 45.9 | 45.46 | | 6.79 | 98.13 | 94.12 | 99.03 | 90.89 | 43.63 |
| Kidney-10-2 | 47.33 | 46.39 | | 6.87 | 98.12 | 94.18 | 98.01 | 89.68 | 54.68 |
| Kidney-10-3 | 47.11 | 46.24 | | 6.83 | 98.04 | 94.01 | 98.16 | 90.65 | 54.86 |
| **Group 13℃** |  |  | |  |  |  |  |  |  |
| Gut-13-1 | 42.91 | 42.06 | | 6.24 | 98.21 | 94.41 | 98.02 | 91.76 | 50.03 |
| Gut-13-2 | 46.65 | 45.85 | | 6.79 | 98.13 | 94.21 | 98.27 | 91.52 | 49.25 |
| Gut-13-3 | 41.72 | 40.91 | | 6.01 | 98.04 | 93.99 | 98.07 | 91.95 | 48.74 |
| Liver-13-1 | 41.3 | 40.44 | | 6.02 | 98.21 | 94.37 | 97.91 | 94.74 | 56.77 |
| Liver-13-2 | 45.41 | 44.41 | | 6.61 | 98.2 | 94.4 | 97.79 | 96.09 | 63.72 |
| Liver-13-3 | 42.1 | 41.28 | | 6.14 | 98.25 | 94.49 | 98.06 | 95.84 | 61.33 |
| Spleen-13-1 | 45.86 | 45.06 | | 6.67 | 98.35 | 94.75 | 98.26 | 93.92 | 49.04 |
| Spleen-13-2 | 45.31 | 44.42 | | 6.54 | 98.09 | 94.15 | 98.04 | 93.59 | 42 |
| Spleen-13-3 | 45.73 | 44.81 | | 6.58 | 98.22 | 94.46 | 97.98 | 92.61 | 46.81 |
| Kidney-13-1 | 40.35 | 39.69 | | 5.88 | 98.17 | 94.3 | 98.35 | 92.24 | 53.85 |
| Kidney-13-2 | 47.41 | 46.69 | | 6.92 | 98.29 | 94.62 | 98.49 | 91.09 | 48.76 |
| Kidney-13-3 | 40.6 | 39.81 | | 5.91 | 98.24 | 94.53 | 98.07 | 91.63 | 48.87 |
| **Group 16℃** |  |  | |  |  |  |  |  |  |
| Gut-16-1 | 46.27 | 45.38 | | 6.74 | 98.19 | 94.37 | 98.08 | 90.21 | 48.09 |
| Gut-16-2 | 49.33 | 48.57 | | 7.17 | 98.17 | 94.31 | 98.45 | 91.72 | 50.24 |
| Gut-16-3 | 51.34 | 50.39 | | 7.43 | 98.1 | 94.1 | 98.15 | 91.84 | 49.47 |
| Liver-16-1 | 40.32 | 39.52 | | 5.87 | 98.09 | 94.11 | 98 | 94.3 | 57.1 |
| Liver-16-2 | 44.35 | 43.19 | | 6.41 | 98.12 | 94.22 | 97.38 | 96.11 | 64.06 |
| Liver-16-3 | 40.07 | 39.23 | | 5.81 | 98.22 | 94.45 | 97.89 | 94.29 | 54.75 |
| Spleen-16-1 | 47.44 | 46.76 | | 6.98 | 98.1 | 94.05 | 98.56 | 92.11 | 43.58 |
| Spleen-16-2 | 45.58 | 44.47 | | 6.56 | 98.19 | 94.38 | 97.57 | 92.41 | 46.65 |
| Spleen-16-3 | 48.06 | 47.14 | | 6.98 | 98.1 | 94.14 | 98.1 | 92.3 | 47.98 |
| Kidney-16-1 | 46.41 | 45.57 | | 6.76 | 98.12 | 94.17 | 98.17 | 91.02 | 47.6 |
| Kidney-16-2 | 44.49 | 43.49 | | 6.46 | 98.05 | 94.03 | 97.74 | 90.06 | 46.94 |
| Kidney-16-3 | 42.25 | 41.43 | | 6.16 | 98.06 | 94.01 | 98.06 | 89.98 | 46.57 |
| **Group 19℃** | | | | | | | |  |  |
| Gut-19-1 | 50.18 | 49.17 | | 7.3 | 98.07 | 94.02 | 97.98 | 90.57 | 43.85 |
| Gut-19-2 | 50.65 | 49.68 | | 7.33 | 98.22 | 94.4 | 98.08 | 92.38 | 54.45 |
| Gut-19-3 | 47.46 | 46.4 | | 6.87 | 98.27 | 94.53 | 97.76 | 90.61 | 47.38 |
| Liver-19-1 | 44.51 | 43.55 | | 6.45 | 98.09 | 94.11 | 97.83 | 91.37 | 47.04 |
| Liver-19-2 | 43.19 | 42.36 | | 6.29 | 98.18 | 94.34 | 98.08 | 94.57 | 45.89 |
| Liver-19-3 | 46.46 | 45.3 | | 6.69 | 98.33 | 94.74 | 97.5 | 91.69 | 44.61 |
| Spleen-19-1 | 44.26 | 43.06 | | 6.38 | 98.25 | 94.5 | 97.28 | 92.32 | 46.55 |
| Spleen-19-2 | 47.15 | 46.42 | | 6.93 | 97.83 | 93.43 | 98.44 | 91.9 | 48.35 |
| Spleen-19-3 | 48.9 | 48.2 | | 7.19 | 98.18 | 94.28 | 98.58 | 93.39 | 48.72 |
| Kidney-19-1 | 44.29 | 43.08 | | 6.39 | 98.07 | 94.1 | 97.26 | 87.35 | 42.05 |
| Kidney-19-2 | 50.31 | 49.27 | | 7.3 | 98.2 | 94.36 | 97.94 | 94.34 | 53.4 |
| Kidney-19-3 | 44.66 | 43.56 | | 6.44 | 98.01 | 93.93 | 97.55 | 88.25 | 45.19 |
